# Supplementary material for: Analysis of the PvuII and XbaI polymorphisms in the estrogen receptor alpha gene in girls with central precocious puberty: a pilot study
Source: BMC Med Genet. 2018 May 25;19:84. doi: 10.1186/s12881-018-0577-x (PMC5970514; doi:10.1186/s12881-018-0577-x)
Supplement: Supplementary file 1 — Polymorphism data. Description of data: The XBAl and PvuII Polymorphism data of control and study (precocious puberty) were on the additional file. (XLSX 37 kb) [file 12881_2018_577_MOESM1_ESM.xlsx]

## Sheet: Xbal
Polymorphism data
XBAl																		Excluded samples
Genotypes																		12
																		49
Control	n= 15		Study	n=12		Control	n=79		Study	n=33		Control	n=17		Study	n=28		61
2	AA		GSF-FE	AA		1	AG		LAT-FE	AG		16	GG		JSJ2-ICHC	GG
60	AA		AIGL	AA		3	AG		POB-FE	AG		24	GG		CS	GG
72	AA		CSMT-FE	AA		4	AG		KADW-FE	AG		25	GG		RIM	GG
91	AA		LCC-FE	AA		5	AG		CNA1-FE	AG		26	GG		TAM-FE	GG
92	AA		KAD-FE	AA		6	AG		REPO-FE	AG		32	GG		LCC	GG
41	AA		AIGL-FE	AA		7	AG		LTB-FE	AG		35	GG		TEPS	GG
42	AA		JAS-FE	AA		8	AG		ALVS1-FE	AG		44	GG		JAS2-FE	GG
43	AA		ABFS-FE	AA		9	AG		JSJ-ICHC	AG		45	GG		LAS	GG
46	AA		dsd I.C.R	AA		10	AG		CBS-ICHC	AG		53	GG		TBM-FE	GG
47	AA		GDE I.C.R	AA		11	AG		RI-FE	AG		56	GG		CNA-FE	GG
84	AA		ADG I.C.R	AA		13	AG		POB	AG		59	GG		REPO	GG
85	AA		CDF I.C.R	AA		14	AG		GSF2-FE	AG		63	GG		CBS	GG
95	AA					15	AG		LTB	AG		64	GG		TEPS-FE	GG
97	AA					17	AG		JSS-FE	AG		67	GG		ALVS-FE	GG
98	AA					18	AG		VRPD-FE	AG		77	GG		CCSA-FE	GG
						19	AG		LAST	AG		83	GG		SSD-FE	GG
						20	AG		EMM-FE	AG		96	GG		DBC	GG
						21	AG		RCN-FE	AG					SDS2 I.C.R	GG
						22	AG		ADLL-FE	AG					ms I.C.R	GG
						23	AG		GNC-FE	AG					ANN I.C.R	GG
						27	AG		PFL	AG					HC I.C.R	GG
						28	AG		MGDM	AG					HC JMM	GG
						29	AG		AB I.C.R	AG					HC CG	GG
						30	AG		FDS I.C.R	AG					JEDF-FE	GG
						31	AG		DSD1 I.C.R	AG					MM-FE	GG
						33	AG		mms I.C.R	AG					MASS-FE	GG
						34	AG		CHA I.C.R	AG					TCS-FE	GG
						36	AG		DCD I.C.R	AG					MJS -FE	GG
						37	AG		TDD-FE	AG
						38	AG		MAG-FE	AG
						39	AG		TSS-FE	AG
						40	AG		MAJD-FE	AG
						48	AG		MG - FE	AG
						50	AG
						51	AG
						52	AG
						54	AG
						55	AG
						57	AG
						58	AG
						62	AG
						65	AG
						66	AG
						68	AG
						69	AG
						70	AG
						71	AG
						73	AG
						74	AG
						75	AG
						76	AG
						78	AG
						79	AG
						80	AG
						81	AG
						82	AG
						86	AG
						87	AG
						88	AG
						89	AG
						90	AG
						93	AG
						94	AG
						99	AG
						100	AG
						101	AG
						102	AG
						103	AG
						104	AG

## Sheet: PVII
PvuII
Genotypes						Genotypes						Genotypes						Excluded samples
Genotypes						Control	n=54		Study	n=46		Control	n=26		Study	n=17		12
Control	n=22		Study	n=10		4	TC		JSJ-ICHC	TC		1	CC		JSJ2-ICHC	CC		49
3	TT		JEDF-FE	TT		5	TC		CBS-ICHC	TC		2	CC		CBS	CC		61
8	TT		MM-FE	TT		6	TC		RI-FE	TC		13	CC		RIM	CC
9	TT		MASS-FE	TT		7	TC		LAST	TC		17	CC		LAS-FE	CC
10	TT		TCS-FE	TT		11	TC		TBM-FE	TC		42	CC		TBM-FE	CC
31	TT		TDD-FE	TT		14	TC		POB-FE	TC		44	CC		POB	CC
35	TT		MAG-FE	TT		15	TC		GSF-FE	TC		45	CC		GSF2-FE	CC
50	TT		TSS-FE	TT		16	TC		LCC-FE	TC		47	CC		LCC	CC
52	TT		MAJD-FE	TT		18	TC		KAD-FE	TC		59	CC		KADW-FE	CC
53	TT		MJS -FE	TT		19	TC		AIGL	TC		68	CC		AIGL-FE	CC
56	TT		MG - FE	TT		20	TC		CNA1-FE	TC		71	CC		CNA-FE	CC
57	TT					21	TC		REPO-FE	TC		74	CC		REPO	CC
58	TT					22	TC		CSMT-FE	TC		75	CC		CS	CC
60	TT					23	TC		TEPS-FE	TC		76	CC		TEPS	CC
65	TT					24	TC		LTB-FE	TC		77	CC		LTB	CC
67	TT					25	TC		ALVS1-FE	TC		78	CC		ALVS-FE	CC
80	TT					26	TC		JAS-FE	TC		79	CC		JAS2-FE	CC
85	TT					27	TC		JSS-FE	TC		81	CC
97	TT					28	TC		VRPD-FE	TC		82	CC
98	TT					29	TC		LAS	TC		83	CC
99	TT					30	TC		EMM-FE	TC		84	CC
100	TT					32	TC		RCN-FE	TC		86	CC
101	TT					33	TC		CCSA-FE	TC		87	CC
						34	TC		ADLL-FE	TC		88	CC
						36	TC		ABFS-FE	TC		89	CC
						37	TC		SSD-FE	TC		90	CC
						38	TC		GNC-FE	TC
						39	TC		PFL	TC
						40	TC		MGDM	TC
						41	TC		DBC	TC
						43	TC		AB I.C.R	TC
						46	TC		FDS I.C.R	TC
						48	TC		DSD2 I.C.R	TC
						51	TC		SDS I.C.R	TC
						54	TC		dsd I.C.R	TC
						55	TC		mms I.C.R	TC
						62	TC		ms I.C.R	TC
						63	TC		ANN I.C.R	TC
						64	TC		CHA I.C.R	TC
						66	TC		DCD I.C.R	TC
						69	TC		GDE I.C.R	TC
						70	TC		ADG I.C.R	TC
						72	TC		CDF I.C.R	TC
						73	TC		HC I.C.R	TC
						91	TC		HC JMM	TC
						92	TC		HC CG	TC
						93	TC
						94	TC
						95	TC
						96	TC
						102	TC
						103	TC
						104	TC

## Sheet: Hardy-Weinberg equilibrium
Xbal	control
		A simple calculator to determine whether observed genotype frequencies are consistent with Hardy-Weinberg equilibrium
		Genotypes	*Observed #	Expected #
		Homozygote reference:	14.85	24.0198
		Heterozygote:	68.32	49.9804
		Homozygote variant:	16.83	25.9998
		Var allele freq:	0.5099	100
		Chi-squared value =	13.4642
		Chi-squared test P value =	0.000243159
		(if < 0.05 - not consistent with HWE)
		*Put your values here		Me
PvuII	control
		A simple calculator to determine whether observed genotype frequencies are consistent with Hardy-Weinberg equilibrium
		Genotypes	*Observed #	Expected #
		Homozygote reference:	25.74	27.0192
		Heterozygote:	52.48	49.9216
		Homozygote variant:	21.78	23.0592
		Var allele freq:	0.4802	100
		Chi-squared value =	0.262641
		Chi-squared test P value =	0.608311
		(if < 0.05 - not consistent with HWE)
		*Put your values here		Me

## Sheet: association control
Association Control				Control					Study
1	AG	CC		AA + TT	AA + TC	AA + CC	total
2	AA	CC		4	7	4	15
3	AG	TT
4	AG	TC		AG + TT	AG + TC	AG + CC
5	AG	TC		14	38	17	69
6	AG	TC
7	AG	TC		GG + TT	GG + TC	GG + CC
8	AG	TT		4	8	5	17
9	AG	TT
10	AG	TT		Total
11	AG	TC		22	53	26	101
13	AG	CC
14	AG	TC
15	AG	TC
16	GG	TC
17	AG	CC
18	AG	TC
19	AG	TC
20	AG	TC
21	AG	TC
22	AG	TC
23	AG	TC
24	GG	TC
25	GG	TC
26	GG	TC
27	AG	TC
28	AG	TC
29	AG	TC
30	AG	TC
31	AG	TT
32	GG	TC
33	AG	TC
34	AG	TC
35	GG	TT
36	AG	TC
37	AG	TC
38	AG	TC
39	AG	TC
40	AG	TC
41	AA	TC
42	AA	CC
43	AA	TC
44	GG	CC
45	GG	CC
46	AA	TC
47	AA	CC
48	AG	TC
50	AG	TT
51	AG	TC
52	AG	TT
53	GG	TT
54	AG	TC
55	AG	TC
56	GG	TT
57	AG	TT
58	AG	TT
59	GG	CC
60	AA	TT
62	AG	TC
63	GG	TC
64	GG	TC
65	AG	TT
66	AG	TC
67	GG	TT
68	AG	CC
69	AG	TC
70	AG	TC
71	AG	CC
72	AA	TC
73	AG	TC
74	AG	CC
75	AG	CC
76	AG	CC
77	GG	CC
78	AG	CC
79	AG	CC
80	AG	TT
81	AG	CC
82	AG	CC
83	GG	CC
84	AA	CC
85	AA	TT
86	AG	CC
87	AG	CC
88	AG	CC
89	AG	CC
90	AG	CC
91	AA	TC
92	AA	TC
93	AG	TC
94	AG	TC
95	AA	TC
96	GG	TC
97	AA	TT
98	AA	TT
99	AG	TT
100	AG	TT
101	AG	TT
102	AG	TC
103	AG	TC
104	AG	TC

## Sheet: association study
Association
CHA I.C.R	AA	TC		Study
ms I.C.R	AA	TC
AB I.C.R	AA	TC		AA + TT	AA + TC	AA + CC	total
ABFS-FE	AA	CC		0	11	1	12
ADG I.C.R	AA	TC
ADLL-FE	AA	TC		AG + TT	AG + TC	AG + CC
AIGL	AA	TC		5	23	5	33
AIGL-FE	AA	TC
ALVS1-FE	AA	TC		GG + TT	GG + TC	GG + CC
ALVS-FE	AA	TC		5	12	11	28
ANN I.C.R	AA	TC
CBS	AG	TC		Total
CBS-ICHC	AA	TC		10	46	17	73
CCSA-FE	AG	TC
CDF I.C.R	AG	TC
CNA1-FE	AG	TC
CNA-FE	AG	TC
CS	AG	TC
CSMT-FE	AG	TC
DBC	AG	TC
DCDS I.C.R	AG	TC
dsd I.C.R	AG	TC
DSD2 I.C.R	AG	TC
EMM-FE	AG	CC
FDS I.C.R	AG	TC
GDE I.C.R	AG	TC
GNC-FE	AG	CC
GSF2-FE	AG	TC
GSF-FE	AG	CC
HC I.C.R	AG	CC
HC CG	AG	TC
HC JMM	AG	TT
JAS2-FE	AG	TT
JAS-FE	AG	TT
JEDF-FE	AG	TC
JSJ2-ICHC	AG	TC
JSJ-ICHC	AG	TC
JSS-FE	AG	CC
KAD-FE	AG	TC
KADW-FE	AG	TC
LAS	AG	TC
LAS-FE	AG	TT
LAST	AG	TC
LCC	AG	TT
LCC-FE	AG	TC
LTB	GG	TC
LTB-FE	GG	CC
MAG-FE	GG	TC
MAJD-FE	GG	TC
MASS-FE	GG	CC
MG - FE	GG	CC
MGDM	GG	CC
MJS -FE	GG	TC
MM-FE	GG	TC
mms I.C.R	GG	TC
PFL	GG	TC
POB	GG	CC
POB-FE	GG	TT
RCN-FE	GG	CC
REPO	GG	TC
REPO-FE	GG	CC
RI-FE	GG	TT
RIM	GG	TT
SDS I.C.R	GG	TT
SSD-FE	GG	CC
TAM-FE	GG	CC
TBM-FE	GG	TC
TCS-FE	GG	TC
TDD-FE	GG	TC
TEPS	GG	CC
TEPS-FE	GG	TT
TSS-FE	GG	CC
VRPD-FE	GG	TC
